# Supplementary material
Source: PubMed Central journal article supplement (PMC4017784)

Supplemental Figure 1.

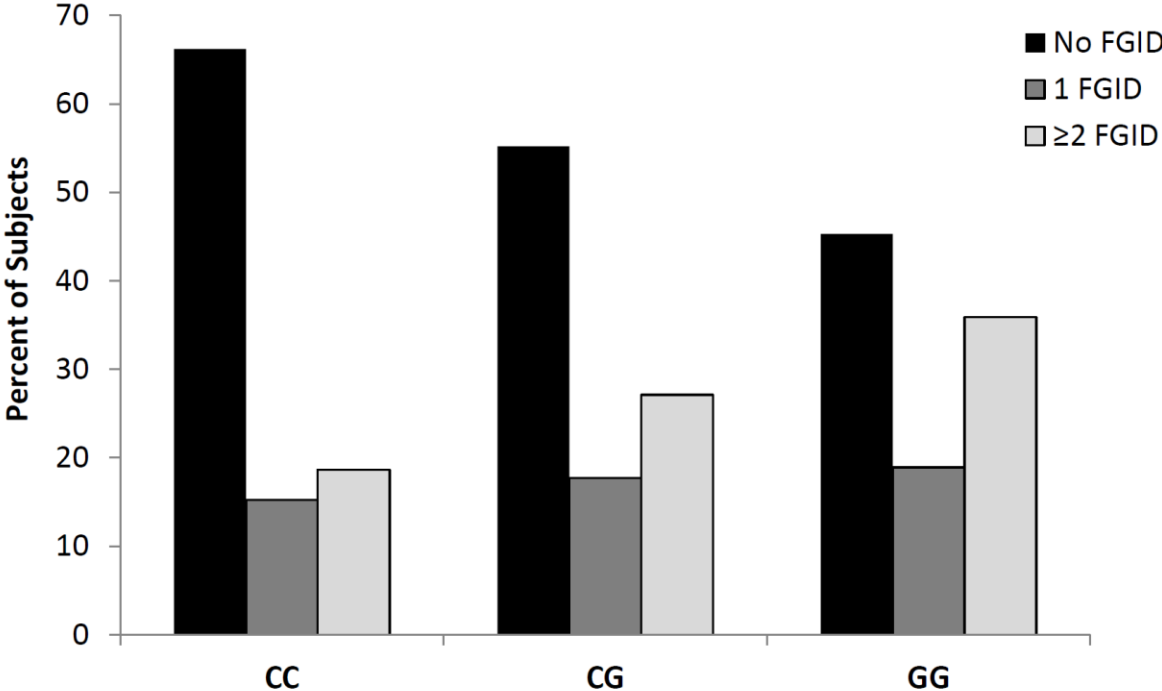

Supplement: NIHMS538958-supplement-Supp_Fig_1.pdf [file NIHMS538958-supplement-Supp_Fig_1.pdf]

Supplemental Figure 2.

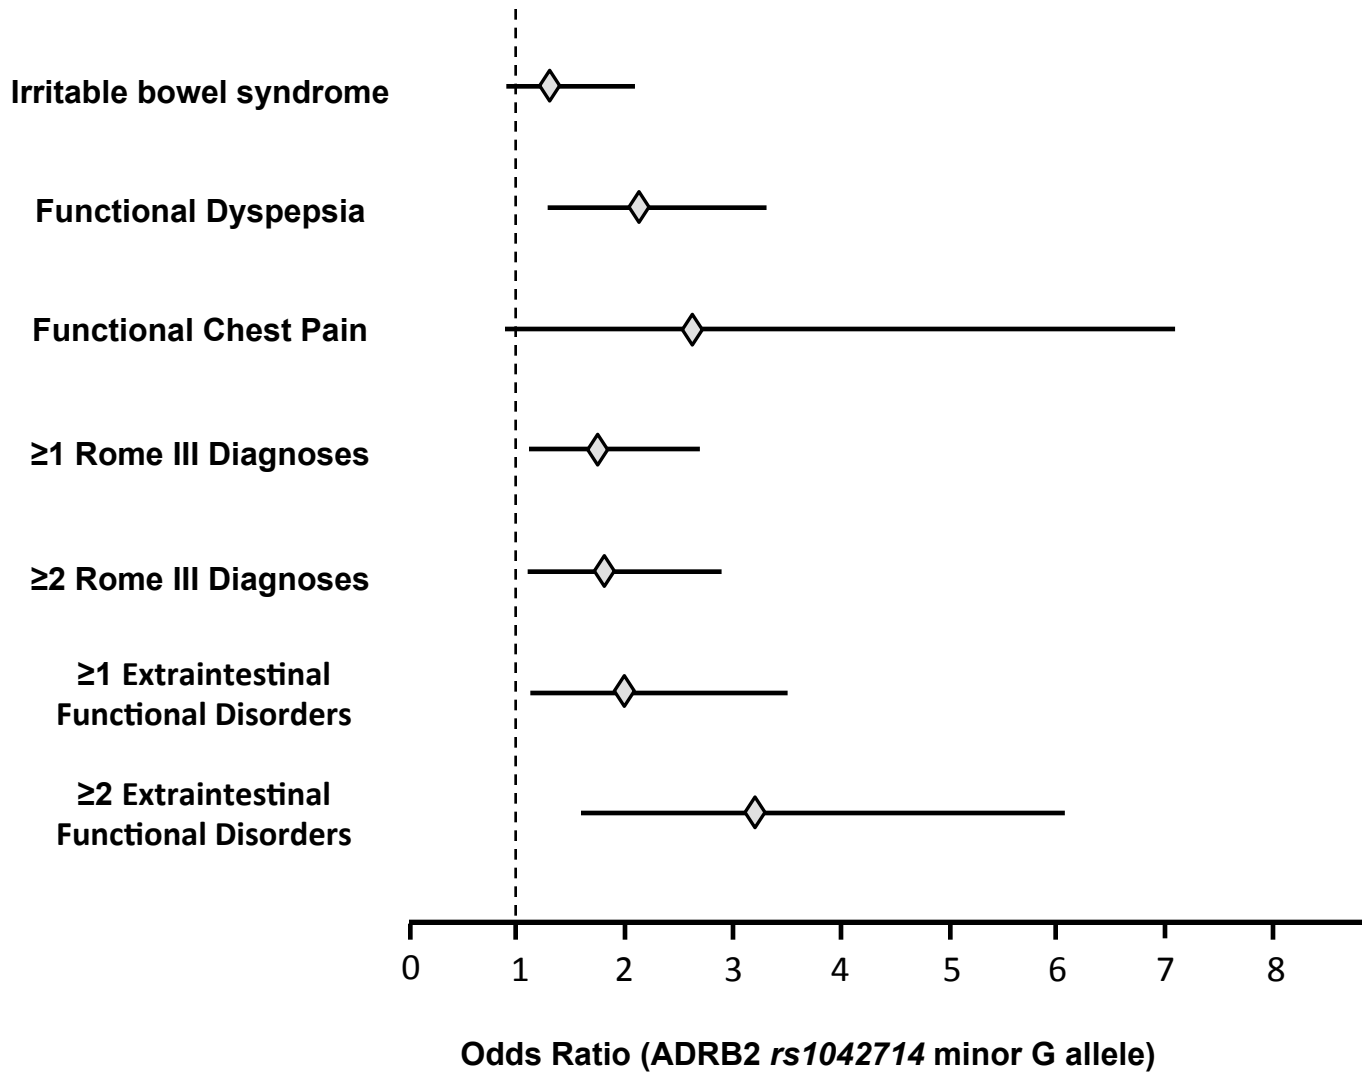

Supplement: NIHMS538958-supplement-Supp_Fig_2.pdf [file NIHMS538958-supplement-Supp_Fig_2.pdf]

Supplemental Figure 3.

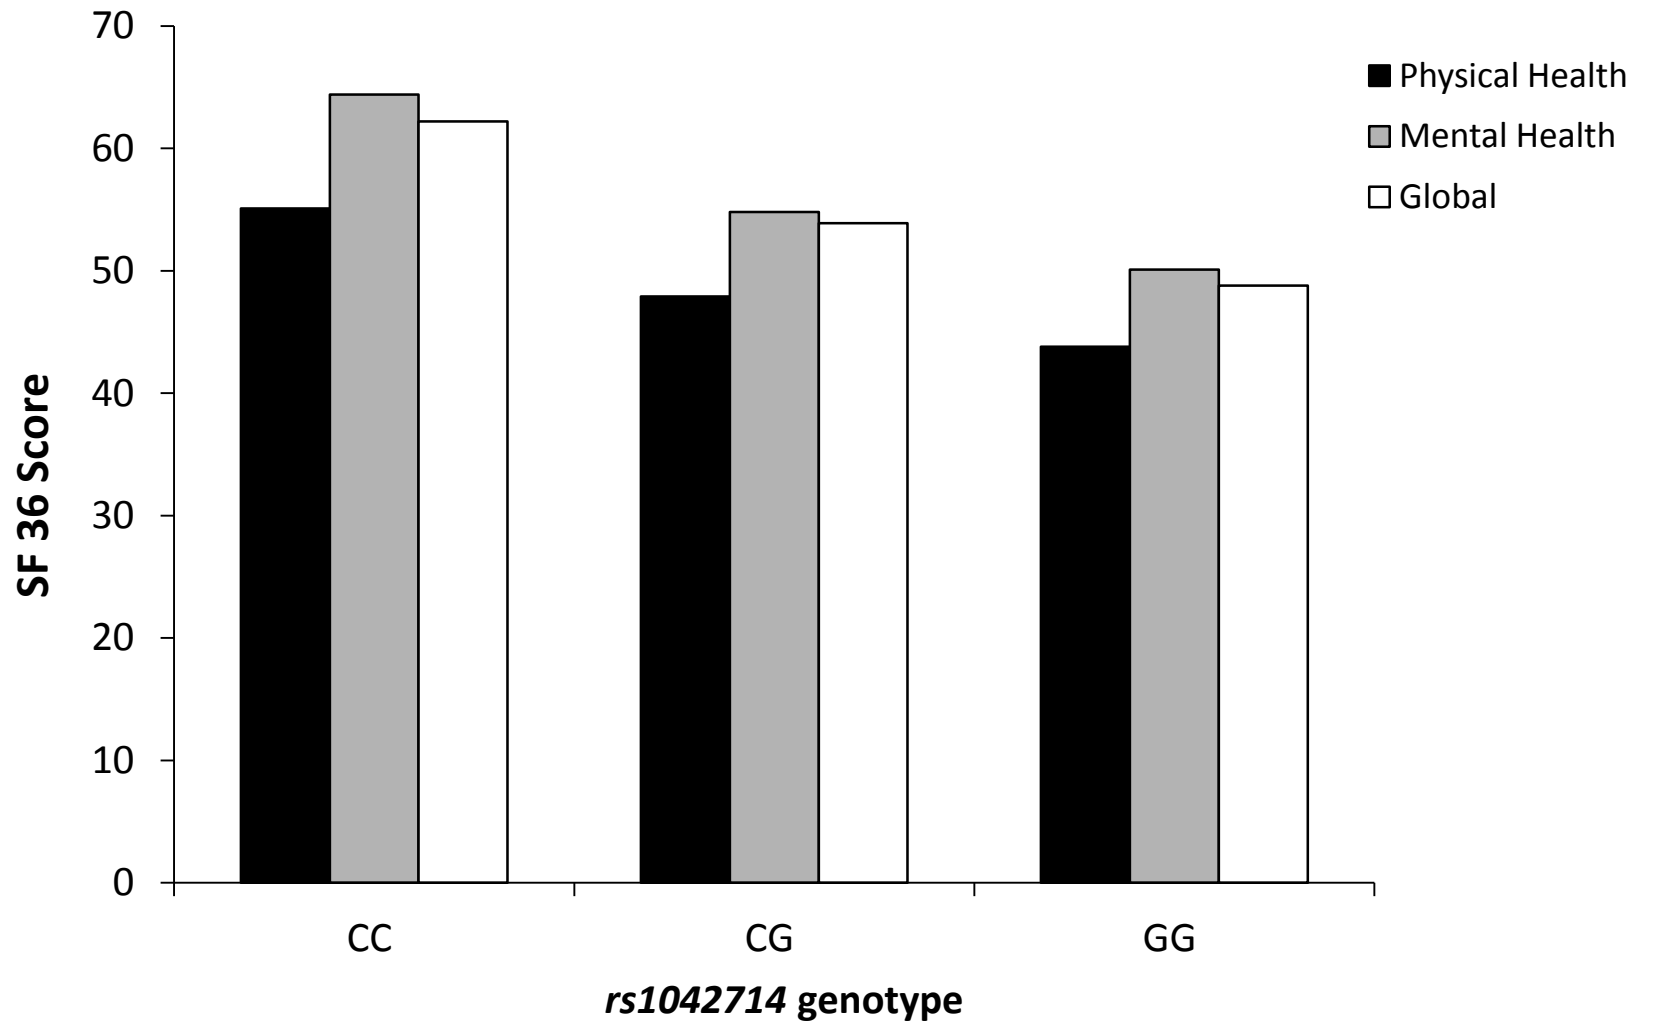

Supplement: NIHMS538958-supplement-Supp_Fig_3.pdf [file NIHMS538958-supplement-Supp_Fig_3.pdf]
